# Supplementary material
Source: PubMed Central journal article supplement (PMC3867585)

# Supplemental Figure 1

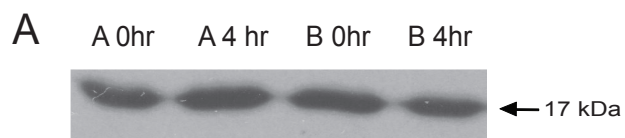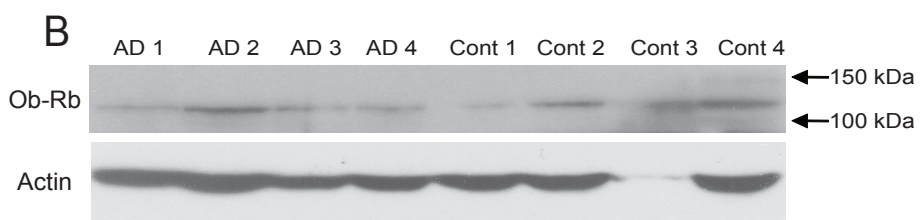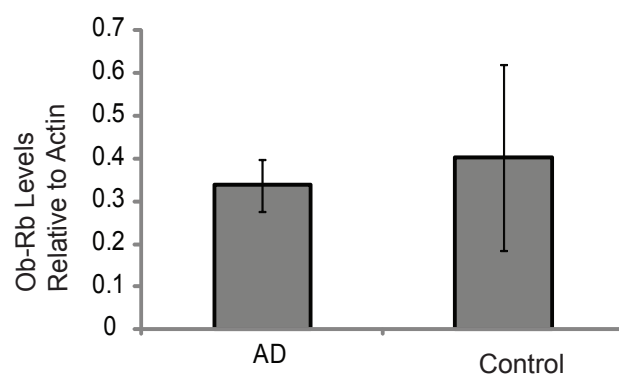

Supplement: NIHMS512093-supplement-Supp_Fig_S1.pdf [file NIHMS512093-supplement-Supp_Fig_S1.pdf]
